# Supplementary material for: SARS-CoV-2 Recombinants: Genomic Comparison between XBF and Its Parental Lineages
Source: MDPI journal article supplement (doi:10.3390/microorganisms11071824), 2023-07-17
Supplement: s1 [file s1]

**Table S1.** Characterizing mutations of the compared lineages.

|              | <b>BA.2.75.3</b> | <b>BA.5.2.3</b> | <b>XBF</b>   |
|--------------|------------------|-----------------|--------------|
| <b>ORF1a</b> |                  | K120N           | K120N        |
|              | S135R            | S135R           | S135R        |
|              | T842I            | T842I           | T842I        |
|              |                  |                 | V1025A       |
|              | S1221L           |                 |              |
|              | G1307S           | G1307S          | G1307S       |
|              | P1640S           |                 |              |
|              | L3027F           | L3027F          | L3027F       |
|              | T3090I           | T3090I          | T3090I       |
|              | L3201F           |                 | L3201F       |
|              | T3255I           | T3255I          | T3255I       |
|              | P3395H           | P3395H          | P3395H       |
|              | DEL3675/3677     | DEL3675/3677    | DEL3675/3677 |
|              | N4060S           |                 | N4060S       |
| <b>ORF1b</b> | P314L            | P314L           | P314L        |
|              | G662S            |                 | G662S        |
|              |                  | T1050N          |              |
|              | R1315C           | R1315C          | R1315C       |
|              | I1566V           | I1566V          | I1566V       |
|              | V1706I           |                 | V1706I       |
|              | T2163I           | T2163I          | T2163I       |
|              | T19I             | T19I            | T19I         |
|              | L24S             | L24S            | L24S         |
|              | DEL25/27         | DEL25/27        | DEL25/27     |
|              |                  | DEL69/70        |              |
|              | G142D            | G142D           | G142D        |
|              | K147E            |                 | K147E        |
|              | W152R            |                 | W152R        |
|              | F157L            |                 | F157L        |
|              | I210V            |                 | I210V        |
|              | V213G            | V213G           | V213G        |

|       |       |       |       |
|-------|-------|-------|-------|
| S     | G257S |       | G257S |
|       | G339H |       | G339H |
|       |       | G339D |       |
|       |       |       | R346T |
|       | S371F | S371F | S371F |
|       | S373P | S373P | S373P |
|       | S375F | S375F | S375F |
|       | T376A | T376A | T376A |
|       | D405N | D405N | D405N |
|       | R408S | R408S | R408S |
|       | K417N | K417N | K417N |
|       | N440K | N440K | N440K |
|       | G446S |       | G446S |
|       |       | L452R |       |
|       | N460K |       | N460K |
|       | S477N | S477N | S477N |
|       | T478K | T478K | T478K |
|       | E484A | E484A | E484A |
|       |       | F486V |       |
|       |       |       | F486P |
|       |       |       | F490S |
|       | Q498R | Q498R | Q498R |
|       | N501Y | N501Y | N501Y |
|       | Y505H | Y505H | Y505H |
|       | D614G | D614G | D614G |
|       | H655Y | H655Y | H655Y |
|       | N679K | N679K | N679K |
|       | P681H | P681H | P681H |
|       | N764K | N764K | N764K |
|       | D796Y | D796Y | D796Y |
|       | Q954H | Q954H | Q954H |
|       | N969K | N969K | N969K |
| ORF3a | T223I | T223I | T223I |
| E     | T9I   | T9I   | T9I   |
|       | T11A  |       | T11A  |

|             |          |          |          |
|-------------|----------|----------|----------|
| <b>M</b>    |          | D3N      |          |
|             | Q19E     | Q19E     | Q19E     |
|             | A63T     | A63T     | A63T     |
| <b>ORF6</b> | D61L     |          | D61L     |
| <b>ORF8</b> | S84L     | S84L     | S84L     |
| <b>N</b>    | P13L     | P13L     | P13L     |
|             | DEL31/33 | DEL31/33 | DEL31/33 |
|             | R203K    | R203K    | R203K    |
|             | G204R    | G204R    | G204R    |
|             | S413R    | S413R    | S413R    |

The contents in red indicate Mutations of Interest.
