# Supplementary material for: SARS-CoV-2 Recombinants: Genomic Comparison between XBF and Its Parental Lineages
Source: MDPI journal article supplement (doi:10.3390/microorganisms11071824), 2023-07-17
Supplement: s1 [file s1]

## SUPPLEMENTAL TABLE

### **Data Availability**

GISAID Identifier: EPI\_SET\_230429cw

doi: [10.55876/gis8.230429cw](https://doi.org/10.55876/gis8.230429cw)

All genome sequences and associated metadata in this dataset are published in GISAID's EpiCoV database. To view the contributors of each individual sequence with details such as accession number, Virus name, Collection date, Originating Lab and Submitting Lab and the list of Authors, visit [10.55876/gis8.230429cw](https://gisaid.org/230429cw)

### **Data Snapshot**

- EPI\_SET\_230429cw is composed of 234 individual genome sequences.
- The collection dates range from 2022-06-02 to 2022-12-13;
- Data were collected in 15 countries and territories;
- All sequences in this dataset are compared relative to hCoV-19/Wuhan/WIV04/2019 (WIV04), the official reference sequence employed by GISAID (EPI\_ISL\_402124). Learn more at <https://gisaid.org/WIV04>.

## SUPPLEMENTAL TABLE

### **Data Availability**

GISAID Identifier: EPI\_SET\_230429fx

doi: [10.55876/gis8.230429fx](https://doi.org/10.55876/gis8.230429fx)

All genome sequences and associated metadata in this dataset are published in GISAID's EpiCoV database. To view the contributors of each individual sequence with details such as accession number, Virus name, Collection date, Originating Lab and Submitting Lab and the list of Authors, visit [10.55876/gis8.230429fx](https://gisaid.org/230429fx)

### **Data Snapshot**

- EPI\_SET\_230429fx is composed of 50 individual genome sequences.
- The collection dates range from 2022-12-16 to 2022-12-27;
- Data were collected in 7 countries and territories;
- All sequences in this dataset are compared relative to hCoV-19/Wuhan/WIV04/2019 (WIV04), the official reference sequence employed by GISAID (EPI\_ISL\_402124). Learn more at <https://gisaid.org/WIV04>.

## SUPPLEMENTAL TABLE

### **Data Availability**

GISAID Identifier: EPI\_SET\_230427dt

doi: [10.55876/gis8.230427dt](https://doi.org/10.55876/gis8.230427dt)

All genome sequences and associated metadata in this dataset are published in GISAID's EpiCoV database. To view the contributors of each individual sequence with details such as accession number, Virus name, Collection date, Originating Lab and Submitting Lab and the list of Authors, visit [10.55876/gis8.230427dt](https://gisaid.org/230427dt)

### **Data Snapshot**

- EPI\_SET\_230427dt is composed of 50 individual genome sequences.
- The collection dates range from 2022-12-27 to 2023-01-12;
- Data were collected in 14 countries and territories;
- All sequences in this dataset are compared relative to hCoV-19/Wuhan/WIV04/2019 (WIV04), the official reference sequence employed by GISAID (EPI\_ISL\_402124). Learn more at <https://gisaid.org/WIV04>.

## SUPPLEMENTAL TABLE

### **Data Availability**

GISAID Identifier: EPI\_SET\_230427nr

doi: [10.55876/gis8.230427nr](https://doi.org/10.55876/gis8.230427nr)

All genome sequences and associated metadata in this dataset are published in GISAID's EpiCoV database. To view the contributors of each individual sequence with details such as accession number, Virus name, Collection date, Originating Lab and Submitting Lab and the list of Authors, visit [10.55876/gis8.230427nr](https://gisaid.org/230427nr)

### **Data Snapshot**

- EPI\_SET\_230427nr is composed of 50 individual genome sequences.
- The collection dates range from 2023-01-12 to 2023-03-02;
- Data were collected in 5 countries and territories;
- All sequences in this dataset are compared relative to hCoV-19/Wuhan/WIV04/2019 (WIV04), the official reference sequence employed by GISAID (EPI\_ISL\_402124). Learn more at <https://gisaid.org/WIV04>.

## SUPPLEMENTAL TABLE

### **Data Availability**

GISAID Identifier: EPI\_SET\_230429zn

doi: [10.55876/gis8.230429zn](https://doi.org/10.55876/gis8.230429zn)

All genome sequences and associated metadata in this dataset are published in GISAID's EpiCoV database. To view the contributors of each individual sequence with details such as accession number, Virus name, Collection date, Originating Lab and Submitting Lab and the list of Authors, visit [10.55876/gis8.230429zn](https://gisaid.org/230429zn)

### **Data Snapshot**

- EPI\_SET\_230429zn is composed of 151 individual genome sequences.
- The collection dates range from 2022-06-25 to 2022-12-05;
- Data were collected in 23 countries and territories;
- All sequences in this dataset are compared relative to hCoV-19/Wuhan/WIV04/2019 (WIV04), the official reference sequence employed by GISAID (EPI\_ISL\_402124). Learn more at <https://gisaid.org/WIV04>.

## SUPPLEMENTAL TABLE

### **Data Availability**

GISAID Identifier: EPI\_SET\_230429yx

doi: [10.55876/gis8.230429yx](https://doi.org/10.55876/gis8.230429yx)

All genome sequences and associated metadata in this dataset are published in GISAID's EpiCoV database. To view the contributors of each individual sequence with details such as accession number, Virus name, Collection date, Originating Lab and Submitting Lab and the list of Authors, visit [10.55876/gis8.230429yx](https://gisaid.org/230429yx)

### **Data Snapshot**

- EPI\_SET\_230429yx is composed of 50 individual genome sequences.
- The collection dates range from 2022-10-07 to 2023-02-24;
- Data were collected in 12 countries and territories;
- All sequences in this dataset are compared relative to hCoV-19/Wuhan/WIV04/2019 (WIV04), the official reference sequence employed by GISAID (EPI\_ISL\_402124). Learn more at <https://gisaid.org/WIV04>.

## SUPPLEMENTAL TABLE

### **Data Availability**

GISAID Identifier: EPI\_SET\_230429gx

doi: [10.55876/gis8.230429gx](https://doi.org/10.55876/gis8.230429gx)

All genome sequences and associated metadata in this dataset are published in GISAID's EpiCoV database. To view the contributors of each individual sequence with details such as accession number, Virus name, Collection date, Originating Lab and Submitting Lab and the list of Authors, visit [10.55876/gis8.230429gx](https://gisaid.org/230429gx)

### **Data Snapshot**

- EPI\_SET\_230429gx is composed of 1,867 individual genome sequences.
- The collection dates range from 2022-07-27 to 2023-04-20;
- Data were collected in 29 countries and territories;
- All sequences in this dataset are compared relative to hCoV-19/Wuhan/WIV04/2019 (WIV04), the official reference sequence employed by GISAID (EPI\_ISL\_402124). Learn more at <https://gisaid.org/WIV04>.
