# Supplementary material for: SARS-CoV-2 Recombinants: Genomic Comparison between XBF and Its Parental Lineages
Source: Microorganisms. 2023 Jul 17;11(7):1824. doi: 10.3390/microorganisms11071824 (PMC10383834; doi:10.3390/microorganisms11071824)
Supplement: Supplementary file 1 [file microorganisms-11-01824-s001.zip]

Archive with 4 entries (4 files):
- Figure_S1.tif
- Figure_S2.tif
- File_S1.pdf
- Table_S1.pdf
